# Supplementary material
Source: PubMed Central journal article supplement (PMC5860441)

SUPPLEMENTARY DATA

**Adipose-Specific Deficiency of Fumarate Hydratase in Mice  
Protects against Obesity, Hepatic Steatosis and Insulin Resistance**

By

Hao Yang,<sup>1,2</sup> Jiang W. Wu,<sup>2</sup> Shu P. Wang,<sup>2</sup> Ilenia Severi,<sup>3</sup> Loris Sartini,<sup>3</sup> Norma Frizzell,<sup>4</sup> Saverio Cinti,<sup>3</sup> Gongshe Yang,<sup>1</sup> and Grant A. Mitchell<sup>2</sup>

<sup>1</sup>Laboratory of Animal Fat Deposition and Muscle Development, College of Animal Science and Technology, Northwest A&F University, Yangling, Shaanxi, China. 712100. <sup>2</sup>Division of Medical Genetics, Department of Pediatrics, Université de Montréal and CHU Sainte-Justine, 3175 Côte Sainte-Catherine, Montreal, QC, Canada, H3T 1C5. <sup>3</sup>Department of Experimental and Clinical Medicine, Center of Obesity, United Hospitals, University of Ancona (UNIVPM), 60020 Ancona, Italy. <sup>4</sup>Department of Pharmacology, Physiology & Neuroscience, School of Medicine, University of South Carolina, Columbia, SC 29209, USA

SUPPLEMENTARY DATA

**Supplementary Table 1. Primers used for genotyping.**

| <b>Primer</b> | <b>Sequence (5'--3')</b>  |
|---------------|---------------------------|
| Cre-1         | GATGGACATGTTTCAGGGATC     |
| Cre-2         | AGCTTGCATGATCTCCGGT       |
| Mfum12        | AGCTAGGTGTAGTTGTTCTCA     |
| Mfum26        | GACCATACTCCTGGTTTACTTC    |
| Neo-1         | ATCCATCTTGTTCAATGGCCGATCC |

SUPPLEMENTARY DATA

**Supplementary Table 2. Primers used for real-time PCR.**

| <b>Gene</b>     | <b>Forward Sequence (5'--3')</b> | <b>Reverse Sequence (5'--3')</b> |
|-----------------|----------------------------------|----------------------------------|
| 12s rRNA        | ACCGCGGTCATACGATTAAC             | CCCAGTTTGGGTCTTAGCTG             |
| ACC1            | ATTGGGCACCCCAGAGCTA              | CCCGCTCCTTCAACTTGCT              |
| ACLY            | TGGATGCCACAGCTGACTAC             | GGTTCAGCAAGGTCAGCTTC             |
| ACSL1           | CAACCCAGAACCATGGAAGT             | GAGGGTGTGGTTGGAAG                |
| AR $\beta$      | CCTTCCGTCGTCTTCTGTGT             | ACTGTTGAGCGGTGGACTCT             |
| ATP5 $\alpha$ 1 | TCTCCATGCCTCTAACACTCG            | CCAGGTCAACAGACGTGTCAG            |
| CD36            | CCTTAAAGGAATCCCCGTGT             | TGCATTTGCCAATGTCTAGC             |
| ChREBP          | CCAGCCTCAAGGTGAGCAA              | CATGTCCC GCATCTGGTCA             |
| COX I           | CTTTTATCCTCCAGGATTTGG            | GCTAAATACTTTGACACCGG             |
| CPT1 $\beta$    | CCCATGTGCTCCTACCAGAT             | CCTTGAAGAAGCGACCTTTG             |
| CS              | CAGCTACAGAAGGAAGTTGG             | AGGAATAGCGAGGGTCAGTC             |
| Cyclophilin     | GCATACAGGTCCTGGCATC              | CACCTTCCCAAAGACCACA              |
| Cyt C           | GGAGGCAAGCATAAGACTGG             | TCCATCAGGGTATCCTCTCC             |
| DGAT1           | CCGTGTTTGTCTGGCATC               | TGACCTTCTTCCCTGTAGAG             |
| DGAT2           | CCTTCTGGTGCTAGGAGTG              | CCAGTCAAATGCCAGCCA               |
| Dio2            | GCACGTCTCCAATCCTGAAT             | TGAACCAAAGTTGACCACCA             |
| FAS             | GCTGCGGAAACTTCAGGAAAT            | AGAGACGTGTCACTCCTGGACTT          |
| FH              | GCTGAAGTAAACCAGGAGT              | CAGTCTGCCAAACCACCA               |
| GAPDH           | CACTCTTCCACCTTCGATGC             | CCCTGTTGCTGTAGCCGTAT             |
| GCG             | CAGGGCCATCTCAGAACC               | GCTATTGGAAAGCCTCTTGC             |
| GLUT1           | CCATCCACCACACTCACCAC             | GCCCAGGATCAGCATCTCAA             |
| GLUT4           | TGGCCCTAAGTATTCAAGTTCTG          | TTCCTTCTATTTGCCGTCTC             |
| GPAM            | CAGTAACGAGTCCAGAAACCC            | CGCCATTGCTGTAGAAGTTGAG           |
| IDH3 $\alpha$   | GAGGTTTTGCTGGTGGTGT              | TCCTCCTGGTCCTTGAATTG             |
| LDHA            | TGTGTGGAGTGGTGTGAATG             | ACCTGCTTGTGAACCTCCTT             |
| LXR $\alpha$    | AGGAGTGTGACTTCGCAA               | CTCTTCTTGCCGCTCAGTTT             |
| mtND1           | GGGATAACAGCGCAATCCTA             | ATCGTTGAACAAACGAACCA             |
| PC              | GATGACCTCACAGCCAAGCA             | GGGTACCTCTGTGTCCAAAGGA           |
| PGC1 $\alpha$   | ACTGAGCTACCCTTGGGATG             | TAAGGATTTCCGGTGGTGACA            |
| PGC1 $\beta$    | GGCAGGTTCAACCCCGA                | CTTGCTAACATCACAGAGGATATCTTG      |
| PPAR $\alpha$   | TCTGGAAGCTTTGGTTTTGC             | GACTGAGGAAGGGCTGGAAG             |
| PPAR $\gamma$   | ACCACTCGCATTCTTTGAC              | TGGGTCAGCTCTTGTGAATG             |
| PRDM16          | TGGCCTTCATCACCTCTCAGAA           | TTTCTGATCCATGGCTCCTGTGA          |
| SDHB            | ACCCCTTCTCTGTCTACCG              | AATGCTCGCTTCTCCTTGTAG            |
| SREBP1c         | GGAGCCATGGATTGCACATT             | GCTTCCAGAGAGGAGGCCAG             |
| TFAM            | CAGGAGGCAAAGGATGATTC             | CCAAGACTTCATTTCAATTGTCG          |
| UCP1            | CAGGATTGGCCTCTACGACTCA           | CACTGCCACACCTCCAGTCA             |
| LCAD            | TCTTTTCTCGGAGCATGACA             | GACCTCTTACTCACTTCTCCAG           |
| MCAD            | GATCCATCACCTCGTGTAAAC            | AAGCCCTTTTCCCCTGAAG              |
| SCAD            | TCGCTGGTCCCTTCGTAGAT             | TGGGATGGGCTTCAAATAG              |

SUPPLEMENTARY DATA

**Supplementary Figure 1. Cre-mediated Gene Targeting of the *FH* Gene**

(A) Genomic organization of the *FH* locus. Exons are shown as filled rectangles. (B) The targeting vector. The potential regions of recombination between the gene and the targeting vector are shown. (C) The targeted allele. (D) The excised *FH* allele. Neo, neomycin resistance cassette; TK, thymidine kinase; arrowheads, LoxP sites. The adenine of the initiation methionine codon is assigned position +1. An amplicon containing exon 3, 63 nt of intron 2 and 59 nt of intron 3 was cloned into a *Bam*HI site engineered downstream of the neomycin resistance (Neo) gene of pMC1neo PolyA (Stratagene, La Jolla, CA). The normal *Hind*III site in exon 3 was removed without changing the peptide sequence by replacing the T8950 residue with A. Oligonucleotides containing LoxP sites were cloned into the 5' and 3' extremities of this insert. Then a 971 bp amplicon from intron 2 of mouse *FH* was cloned upstream of the 5' loxP site. Fourth, the long arm, a 4995 nt amplicon including *FH* exons 4 and 5, was cloned downstream of the 3' loxP site. Fifth, the thymidine kinase gene with a PGK promoter was inserted.

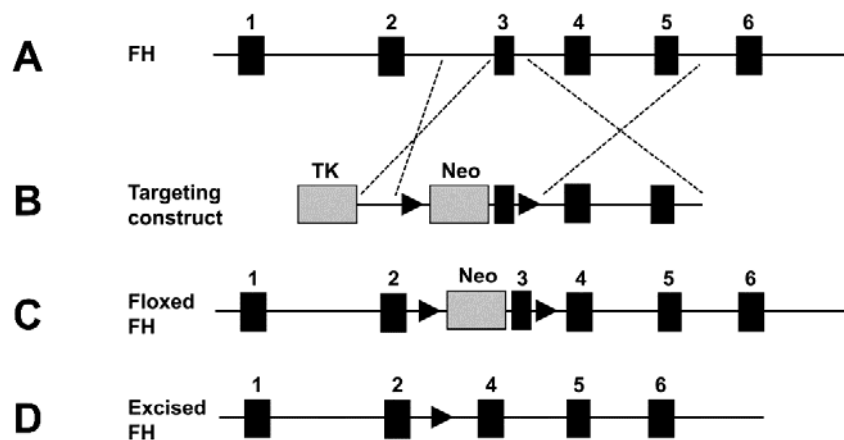

SUPPLEMENTARY DATA

**Supplementary Figure 2. Succinate levels in AFHKO adipose tissue.**

Succinate levels in AFHKO WAT (A) and BAT (B). (5-month-old males, n=8).

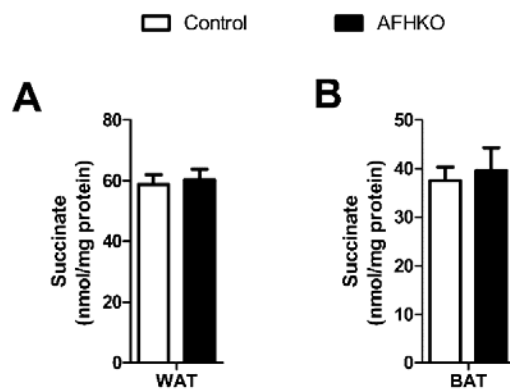

SUPPLEMENTARY DATA

**Supplementary Figure 3. Normal ultrastructure of mitochondria of non-adipose cells from AFHKO BAT.** N, nucleus of a Schwann cell; m, mitochondria; A, axon.

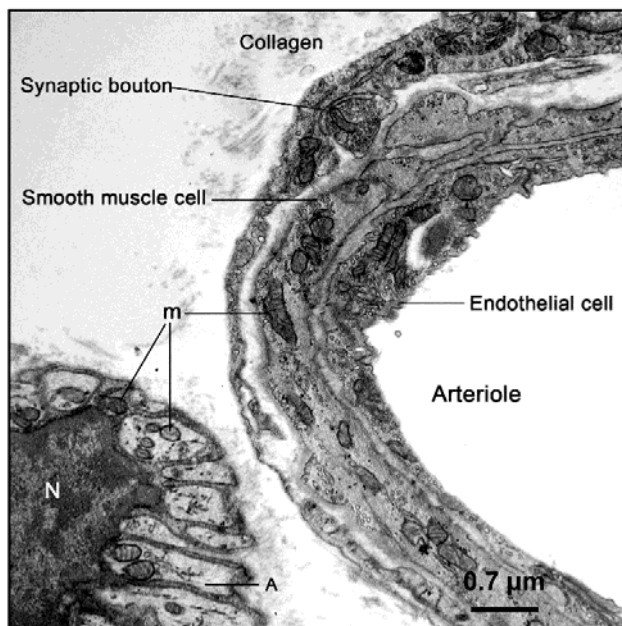

SUPPLEMENTARY DATA

**Supplementary Figure 4. 9-week-old AFHKO mice have low ATP and WAT mass.**

(A) ATP levels in 9-week-old AFHKO WAT and BAT. (B) Body composition of 9-week-old mice. (C) WAT depot masses and BAT mass of control and AFHKO males at 9 weeks of age. PG, perigonadal; PR, perirenal; Mes, mesenteric; SC, subcutaneous; BAT, interscapular BAT. (D) Representative hematoxylin-eosin stained sections of WAT and BAT from 9-week-old control and AFHKO mice receiving a normal chow diet. Scale bar = 100  $\mu$ m. (n=3). \*,  $P < 0.05$ ; \*\*,  $P < 0.01$ .

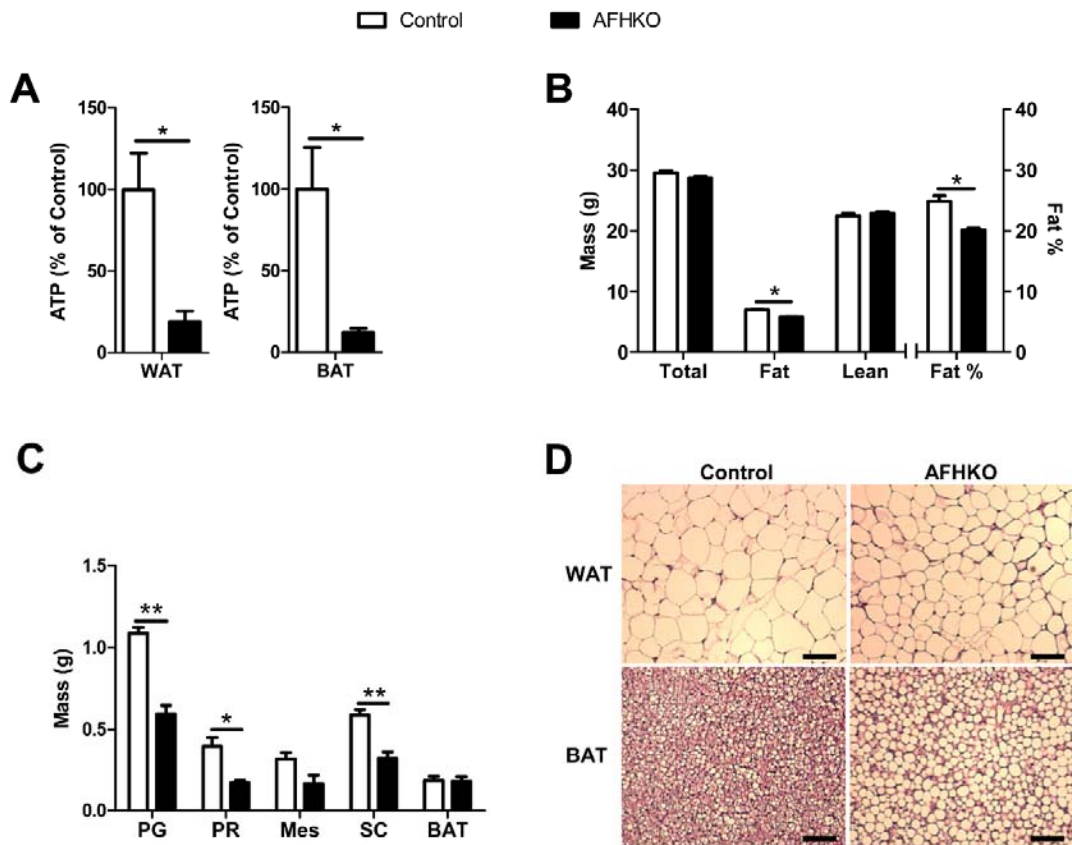

SUPPLEMENTARY DATA

**Supplementary Figure 5. Female AFHKO mice are lean.**

Body composition of 5-month-old (A) and 10-month-old (B) AFHKO female mice (n=8). \*,  $P < 0.05$ ; \*\*,  $P < 0.01$ ; \*\*\*,  $P < 0.001$ .

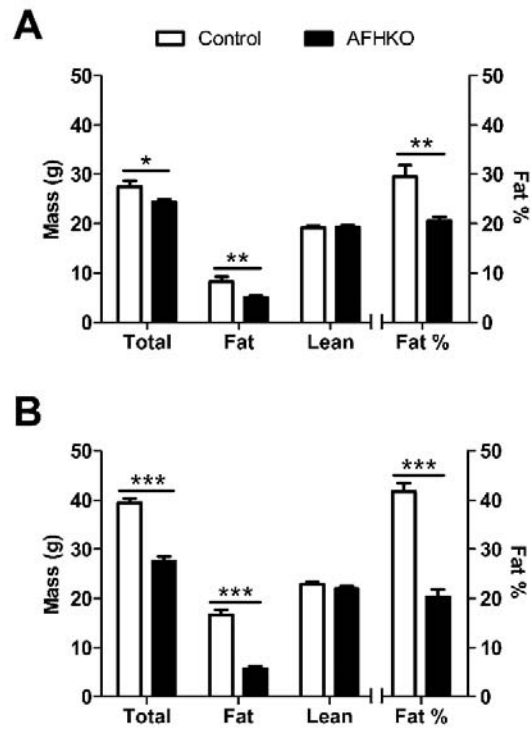



SUPPLEMENTARY DATA

**Supplementary Figure 6. ATP content and TG synthesis are reduced by respiratory chain inhibitors.**

(A) ATP levels were measured in isolated perigonadal adipocytes treated with mitochondrial respiratory chain inhibitors for 3 hours (n=6). (B) TG synthesis in isolated normal perigonadal white adipocytes treated with the inhibitors for 3 hours (n=6). Rot, rotenone; Ant, antimycin A; Olig, oligomycin. \*\*\*,  $P < 0.001$ .

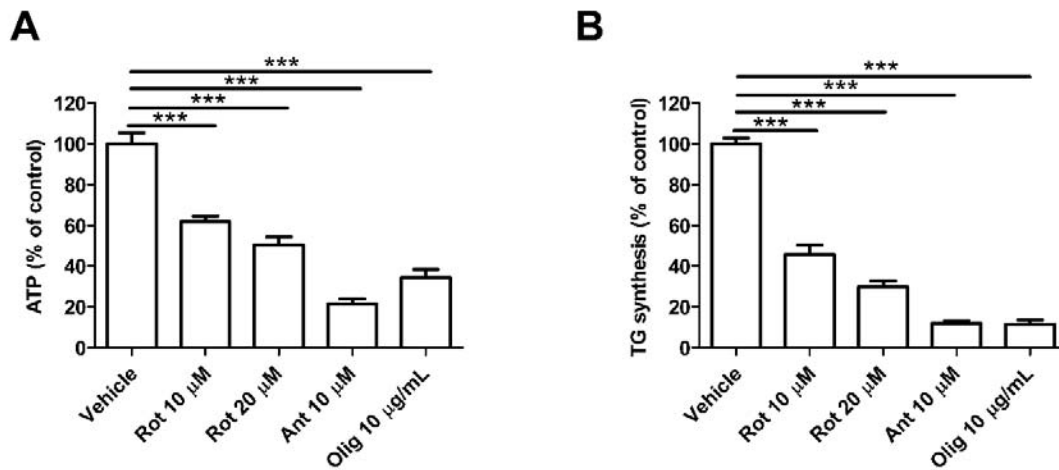

SUPPLEMENTARY DATA

**Supplementary Figure 7. Quantification of Akt Ser473 phosphorylation.**

The level of Akt phosphorylation at Ser473 (pAkt) was quantified by Image J software and normalized to that of total Akt (tAkt). The pAkt/tAkt ratio of an estimated control tissue was assigned a value of 1.0. (A) WAT, (B) Liver and (C) Skeletal muscle. \*,  $P < 0.05$ .

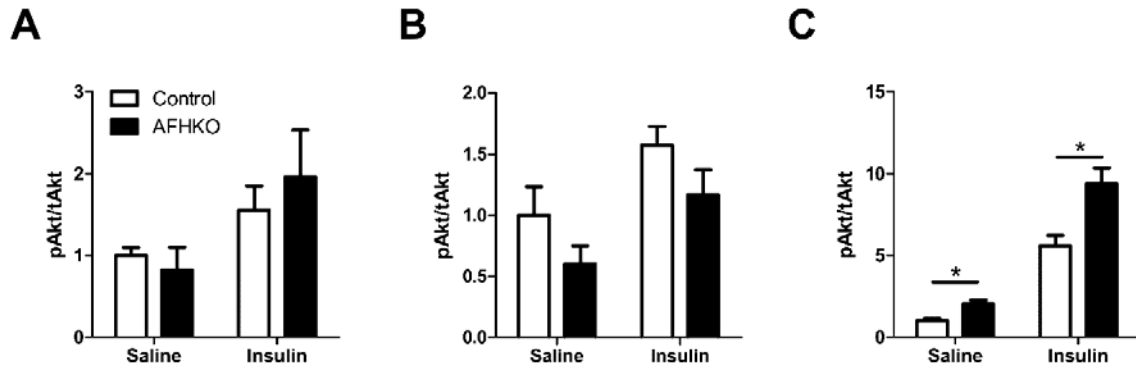

SUPPLEMENTARY DATA

**Supplementary Figure 8. Succination of adiponectin is increased in AFHKO Adipose Tissue.**

Top, total adipose tissue lysates (0.45 mg of protein) were immunoprecipitated with anti-adiponectin antibody and analyzed by SDS-PAGE, and then probed with anti-2SC antibody to detect succination; bottom, the same amount of precipitated protein was probed with anti-adiponectin antibody. The numbers indicate molecular weights of marker proteins (Kilodaltons). Arrows indicate adiponectin monomers.

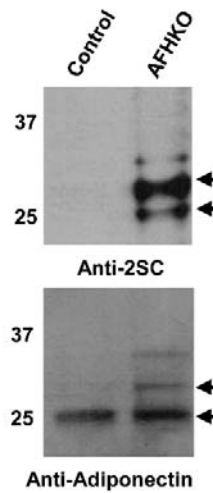

SUPPLEMENTARY DATA

**Supplementary Figure 9. AFHKO mice are resistant to HFD-induced obesity.**

(A) Representative hematoxylin-eosin staining of perigonadal WAT and BAT (n=3). Scale bar, 100  $\mu$ m. (B) Masses of different adipose tissue depots (n=8). PG, perigonadal; PR, perirenal; Mes, mesenteric; SC, subcutaneous; BAT, interscapular BAT. \*,  $P < 0.05$ ; \*\*\*,  $P < 0.001$ .

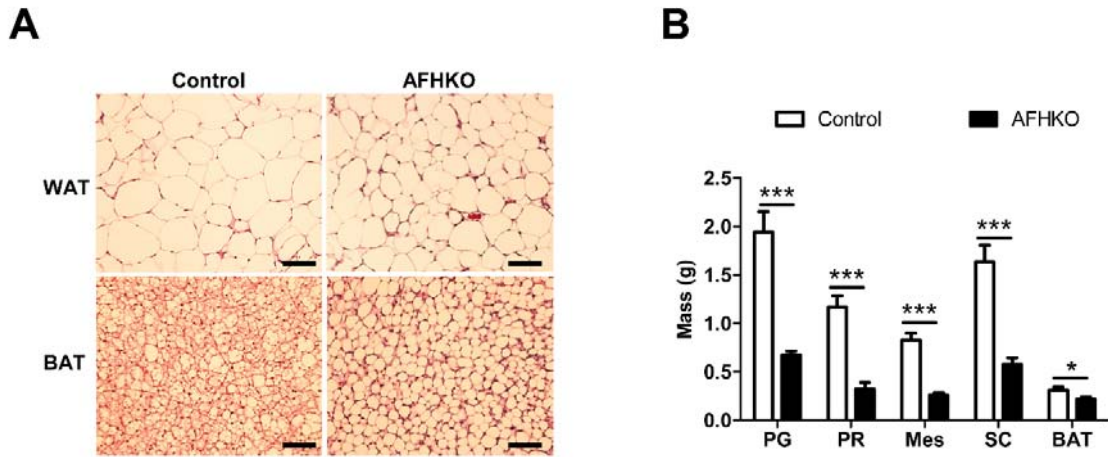

SUPPLEMENTARY DATA

**Supplementary Figure 10. Energy balance in AFHKO mice.**

(A) Food intake was measured on chow diet. (B) Fecal weight and (C) fecal lipid content. (D-G) After acclimatization to the metabolic chamber for 48 h, calorimetry and other measurements were performed for 48 h with free access to food and water. (D) Oxygen consumption. (E) Carbon dioxide production. (F) Energy expenditure. (G) Physical activity.  $VO_2$ ,  $VCO_2$  and energy expenditure values were adjusted to lean mass. (5-month-old males, n=6). \*,  $P<0.05$ .

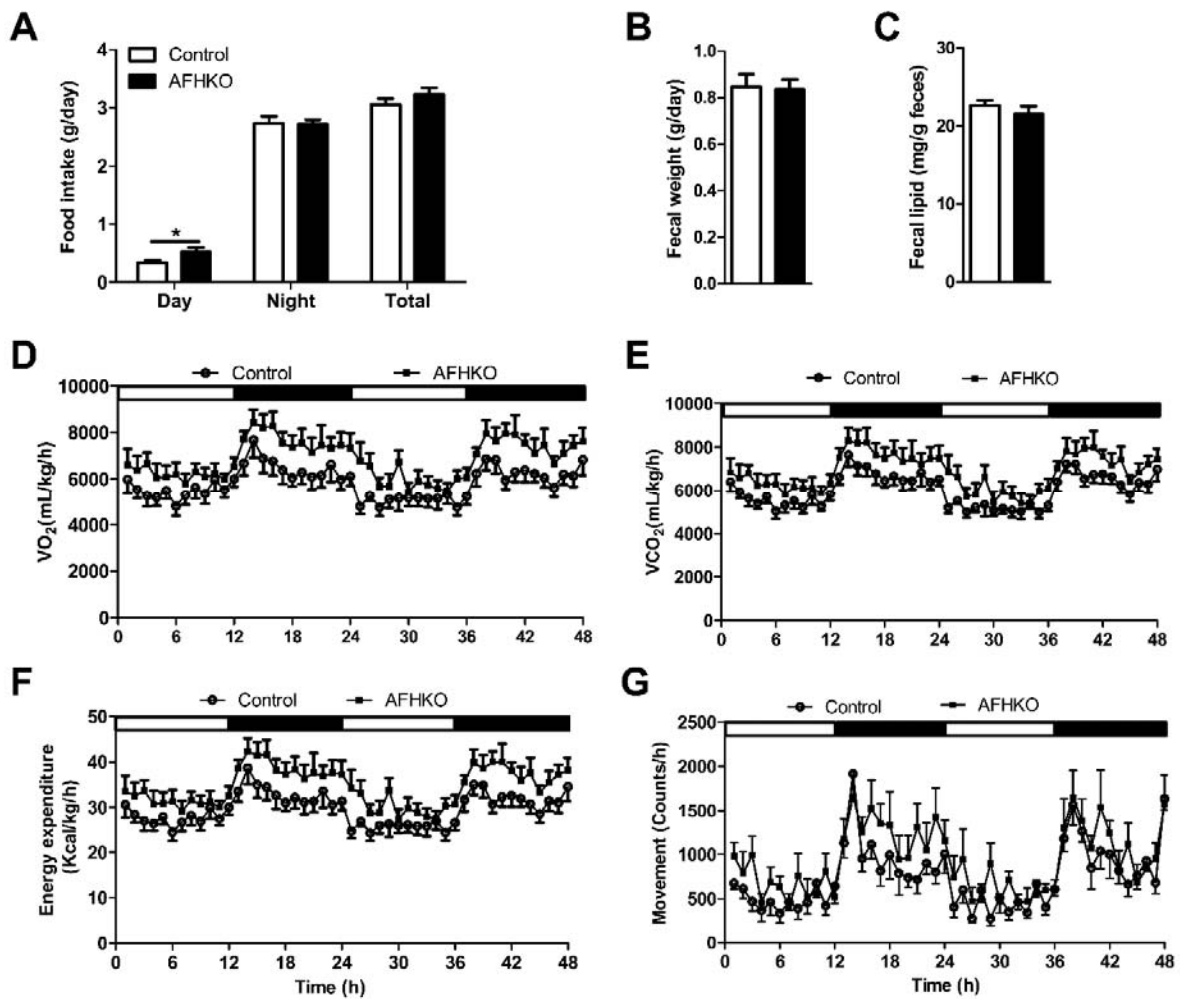

SUPPLEMENTARY DATA

**Supplementary Figure 11. Effects of thermoneutrality on energy metabolism in AFHKO mice.**

Eight pairs of AFHKO and control mice were raised at 21° C on chow diet for 9 months, then were housed individually at thermoneutrality (30° C) for 1 month. Food intake measurement (A) and Dexa scanning (B) were performed before placing at 30° C and after 1 month at 30° C. (C and D) Representative histological sections of perigonadal WAT (C) and BAT (D) (hematoxylin-eosin, n=3). Scale bar = 100 µm. (E) Fat mass increase of control and AFHKO mice after 1 month at 30° C. (F) Skeletal muscle TG content (quadriceps, n=8). \*,  $P<0.05$ ; \*\*\*,  $P<0.001$ .

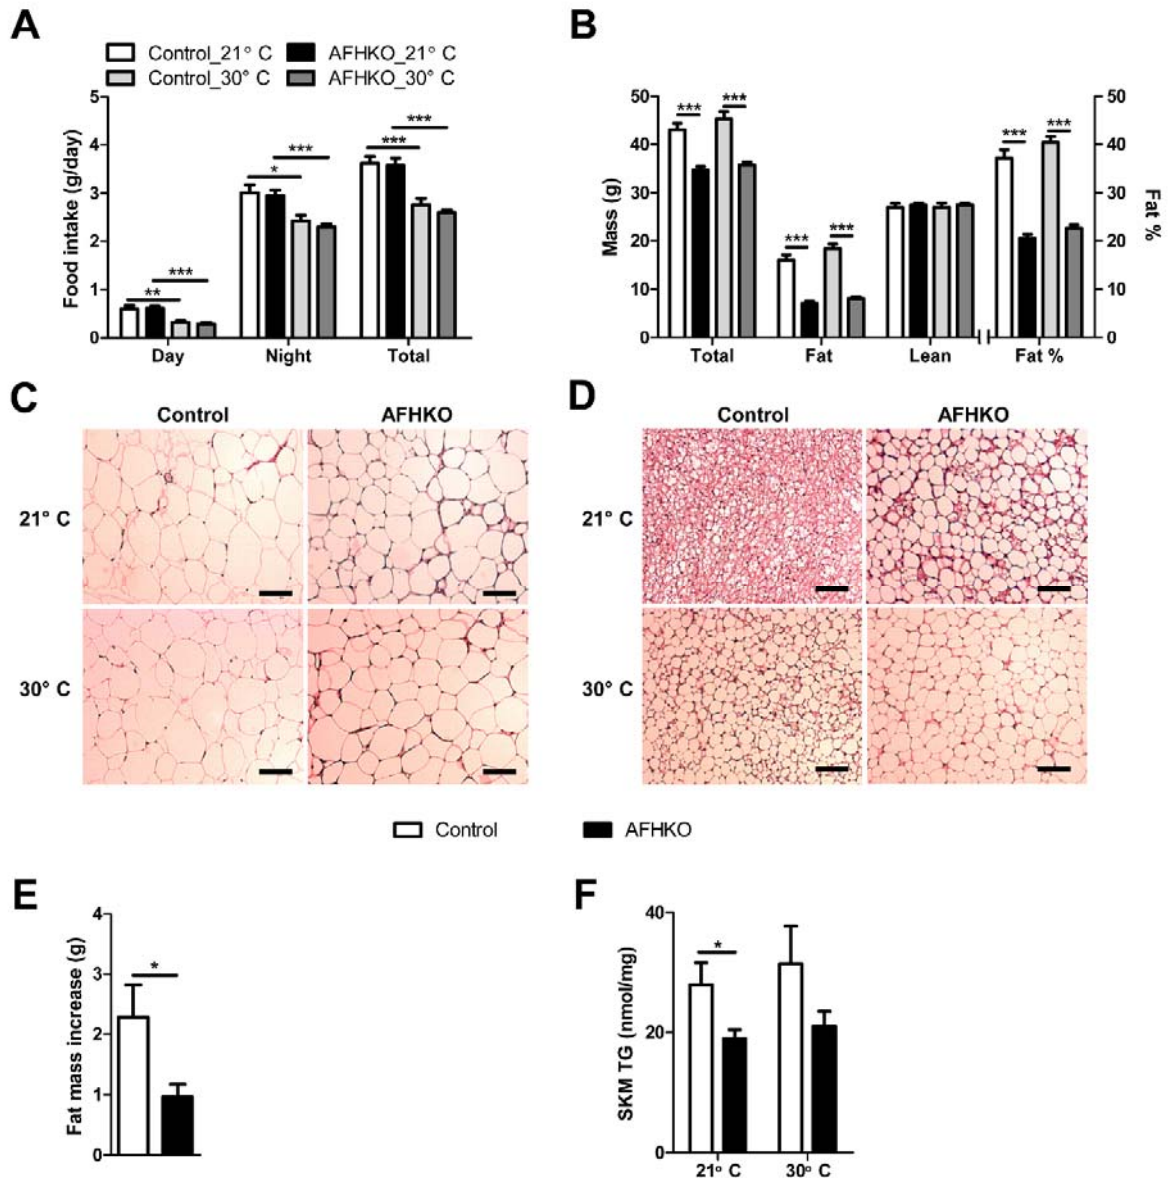

Supplement: DB160136SupplementaryData.pdf [file DB160136SupplementaryData.pdf]
